# Supplementary material for: Active School Transport among Children from Canada, Colombia, Finland, South Africa, and the United States: A Tale of Two Journeys
Source: MDPI journal article supplement (doi:10.3390/ijerph17113847), 2020-05-28
Supplement: s1 [file s1]

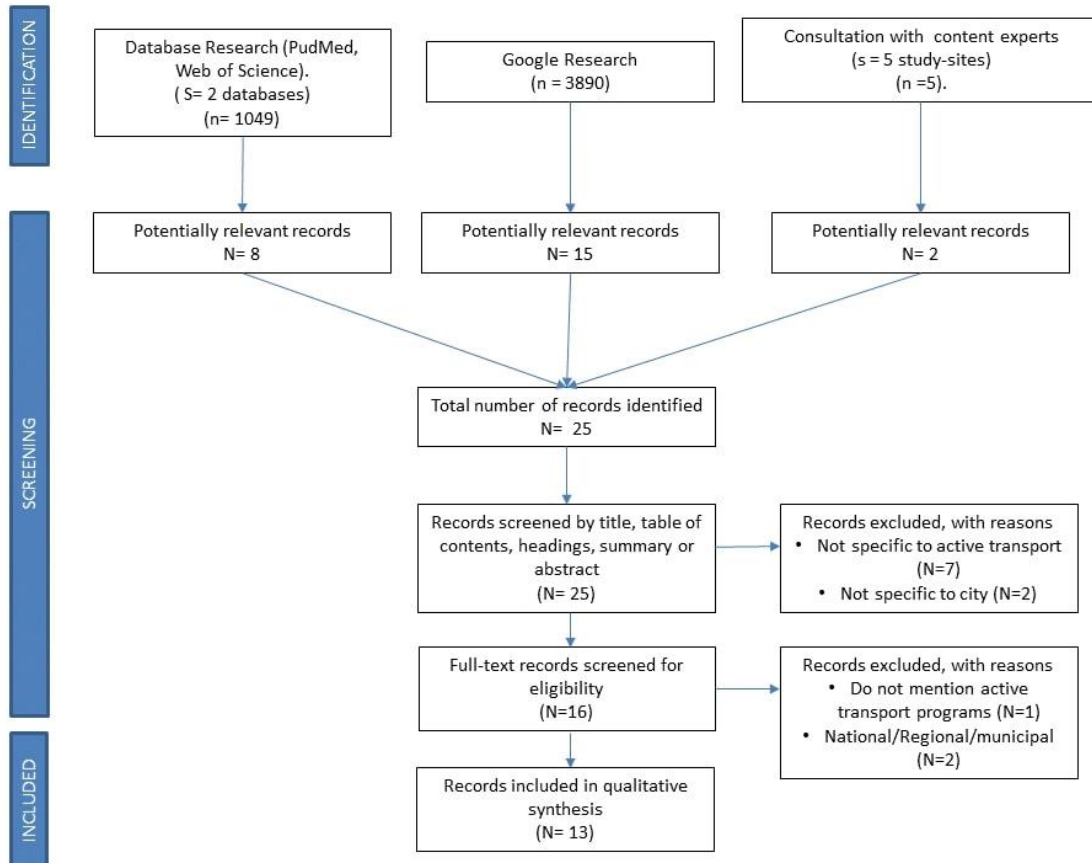

**Figure S1.** Policy search flow chart.
